# Supplementary material for: Lack of recovery of the long-spined sea urchin Diadema antillarum Philippi in Puerto Rico 30 years after the Caribbean-wide mass mortality
Source: PeerJ. 2020 Feb 12;8:e8428. doi: 10.7717/peerj.8428 (PMC7023838; doi:10.7717/peerj.8428)
Supplement: Supplemental Information 1 [file peerj-08-8428-s001.xlsx]

## Sheet: Sheet1
	Pop Density	Rugosity		Zone	Site	Depth	Replicate
1	1.7	1.53		Inshore	Caracoles	1	1
2	1.4	1.38		Inshore	Caracoles	1	2
3	1.4	1.46		Inshore	Caracoles	1	3
4	1.5	1.45		Inshore	Caracoles	1	4
5	1	1.62		Inshore	Caracoles	1	5
6	1.85	1.71		Inshore	Caracoles	1	6
7	0.45	1.22		Inshore	Caracoles	1	7
8	0.65	1.45		Inshore	Caracoles	1	8
9	0.5	1.27		Inshore	Caracoles	1	9
10	0.45	1.46		Inshore	Caracoles	1	10
11	0	1.33		Inshore	Caracoles	2	1
12	0.7	1.4		Inshore	Caracoles	2	2
13	0.35	1.24		Inshore	Caracoles	2	3
14	0.25	1.22		Inshore	Caracoles	2	4
15	0.25	1.22		Inshore	Caracoles	2	5
16	0.05	1.24		Inshore	Caracoles	2	6
17	0.1	1.34		Inshore	Caracoles	2	7
18	0	1.11		Inshore	Caracoles	2	8
19	0.15	1.45		Inshore	Caracoles	2	9
20	0.05	1.54		Inshore	Caracoles	2	10
21	1.05	1		Inshore	Caracoles	3	1
22	1.1	1		Inshore	Caracoles	3	2
23	1.15	1		Inshore	Caracoles	3	3
24	1.2	1		Inshore	Caracoles	3	4
25	1.25	1.15		Inshore	Caracoles	3	5
26	1.3	1.21		Inshore	Caracoles	3	6
27	1.35	1.01		Inshore	Caracoles	3	7
28	1.4	1.03		Inshore	Caracoles	3	8
29	1.45	1.1		Inshore	Caracoles	3	9
30	1.5	1.09		Inshore	Caracoles	3	10
31	0.45	1.46		Inshore	Enrique	1	1
32	2.2	1.21		Inshore	Enrique	1	2
33	1.95	1.34		Inshore	Enrique	1	3
34	1.5	1.31		Inshore	Enrique	1	4
35	3.35	1.62		Inshore	Enrique	1	5
36	2.75	1.46		Inshore	Enrique	1	6
37	2.55	1.53		Inshore	Enrique	1	7
38	2.75	1.27		Inshore	Enrique	1	8
39	1.6	1.59		Inshore	Enrique	1	9
40	2.55	1.43		Inshore	Enrique	1	10
41	0	1.37		Inshore	Enrique	2	1
42	0.05	1.39		Inshore	Enrique	2	2
43	0	1.28		Inshore	Enrique	2	3
44	0	1.39		Inshore	Enrique	2	4
45	0	1.6		Inshore	Enrique	2	5
46	0	1.73		Inshore	Enrique	2	6
47	0	1.4		Inshore	Enrique	2	7
48	0	1.59		Inshore	Enrique	2	8
49	0	1.51		Inshore	Enrique	2	9
50	0	1.61		Inshore	Enrique	2	10
51	0	1		Inshore	Enrique	3	1
52	0	1		Inshore	Enrique	3	2
53	0	1		Inshore	Enrique	3	3
54	0	1		Inshore	Enrique	3	4
55	0	1.15		Inshore	Enrique	3	5
56	0	1.21		Inshore	Enrique	3	6
57	0	1.01		Inshore	Enrique	3	7
58	0	1.03		Inshore	Enrique	3	8
59	0	1.1		Inshore	Enrique	3	9
60	0	1.09		Inshore	Enrique	3	10
61	3.4	1.18		Inshore	Mata la Gata	1	1
62	4.1	1.23		Inshore	Mata la Gata	1	2
63	3.1	1.16		Inshore	Mata la Gata	1	3
64	3.2	1.31		Inshore	Mata la Gata	1	4
65	2.45	1.32		Inshore	Mata la Gata	1	5
66	2.4	1.28		Inshore	Mata la Gata	1	6
67	3.4	1.18		Inshore	Mata la Gata	1	7
68	2.4	1.2		Inshore	Mata la Gata	1	8
69	3.05	1.49		Inshore	Mata la Gata	1	9
70	2.8	1.29		Inshore	Mata la Gata	1	10
71	1.05	1.49		Inshore	Mata la Gata	2	1
72	0.6	1.15		Inshore	Mata la Gata	2	2
73	0.55	1.13		Inshore	Mata la Gata	2	3
74	0.1	1.38		Inshore	Mata la Gata	2	4
75	0.25	1.38		Inshore	Mata la Gata	2	5
76	0.05	1.4		Inshore	Mata la Gata	2	6
77	0.25	1.34		Inshore	Mata la Gata	2	7
78	0.3	1.27		Inshore	Mata la Gata	2	8
79	0.1	1.37		Inshore	Mata la Gata	2	9
80	0.05	1.24		Inshore	Mata la Gata	2	10
81	0	1.15		Inshore	Mata la Gata	3	1
82	0.05	1.18		Inshore	Mata la Gata	3	2
83	0	1.29		Inshore	Mata la Gata	3	3
84	0	1.44		Inshore	Mata la Gata	3	4
85	0	1.56		Inshore	Mata la Gata	3	5
86	0	1.55		Inshore	Mata la Gata	3	6
87	0	1.49		Inshore	Mata la Gata	3	7
88	0	1.33		Inshore	Mata la Gata	3	8
89	0	1.11		Inshore	Mata la Gata	3	9
90	0	1.49		Inshore	Mata la Gata	3	10
91	4.75	1.43		Midshelf	Laurel	1	1
92	5.45	1.73		Midshelf	Laurel	1	2
93	1.5	1.31		Midshelf	Laurel	1	3
94	7.2	1.72		Midshelf	Laurel	1	4
95	6.7	1.49		Midshelf	Laurel	1	5
96	7.55	1.43		Midshelf	Laurel	1	6
97	4.85	1.33		Midshelf	Laurel	1	7
98	1.35	1.01		Midshelf	Laurel	1	8
99	4.6	1.24		Midshelf	Laurel	1	9
100	5.05	1.49		Midshelf	Laurel	1	10
101	0.15	1.53		Midshelf	Laurel	2	1
102	0.5	1.46		Midshelf	Laurel	2	2
103	0.8	1.44		Midshelf	Laurel	2	3
104	0.3	1.27		Midshelf	Laurel	2	4
105	0.25	1.39		Midshelf	Laurel	2	5
106	0.4	1.65		Midshelf	Laurel	2	6
107	0.3	1.24		Midshelf	Laurel	2	7
108	0.65	1.46		Midshelf	Laurel	2	8
109	0.3	1.29		Midshelf	Laurel	2	9
110	0.3	1.59		Midshelf	Laurel	2	10
111	0.15	1.67		Midshelf	Laurel	3	1
112	0.2	1.67		Midshelf	Laurel	3	2
113	0.2	1.92		Midshelf	Laurel	3	3
114	0.3	1.6		Midshelf	Laurel	3	4
115	0.05	1.37		Midshelf	Laurel	3	5
116	0.15	1.43		Midshelf	Laurel	3	6
117	0.1	1.51		Midshelf	Laurel	3	7
118	0.1	1.56		Midshelf	Laurel	3	8
119	0.05	1.2		Midshelf	Laurel	3	9
120	0	1.24		Midshelf	Laurel	3	10
121	0.85	1.24		Midshelf	Media Luna	1	1
122	1.35	1.22		Midshelf	Media Luna	1	2
123	2.8	1.34		Midshelf	Media Luna	1	3
124	2.35	1.39		Midshelf	Media Luna	1	4
125	0.45	1.04		Midshelf	Media Luna	1	5
126	0.7	1.28		Midshelf	Media Luna	1	6
127	0.85	1.1		Midshelf	Media Luna	1	7
128	0.4	1.18		Midshelf	Media Luna	1	8
129	2.4	1.46		Midshelf	Media Luna	1	9
130	3.4	1.54		Midshelf	Media Luna	1	10
131	0.1	1.42		Midshelf	Media Luna	2	1
132	0	1.42		Midshelf	Media Luna	2	2
133	0.35	1.31		Midshelf	Media Luna	2	3
134	0.15	1.4		Midshelf	Media Luna	2	4
135	0	1.21		Midshelf	Media Luna	2	5
136	0	1.65		Midshelf	Media Luna	2	6
137	0.35	1.39		Midshelf	Media Luna	2	7
138	0.05	1.32		Midshelf	Media Luna	2	8
139	0.05	1.44		Midshelf	Media Luna	2	9
140	0	1.57		Midshelf	Media Luna	2	10
141	0	1.12		Midshelf	Media Luna	3	1
142	0	1.12		Midshelf	Media Luna	3	2
143	0	1.29		Midshelf	Media Luna	3	3
144	0	1.38		Midshelf	Media Luna	3	4
145	0	1.17		Midshelf	Media Luna	3	5
146	0	1.29		Midshelf	Media Luna	3	6
147	0	1.33		Midshelf	Media Luna	3	7
148	0	1.13		Midshelf	Media Luna	3	8
149	0	1		Midshelf	Media Luna	3	9
150	0	1.39		Midshelf	Media Luna	3	10
151	3.35	1.31		Midshelf	San Cristobal	1	1
152	2.4	1.34		Midshelf	San Cristobal	1	2
153	1.7	1.11		Midshelf	San Cristobal	1	3
154	3.3	1.17		Midshelf	San Cristobal	1	4
155	1.8	1.22		Midshelf	San Cristobal	1	5
156	1.45	1.32		Midshelf	San Cristobal	1	6
157	1.75	1.21		Midshelf	San Cristobal	1	7
158	2.35	1.28		Midshelf	San Cristobal	1	8
159	3.85	1.13		Midshelf	San Cristobal	1	9
160	3.1	1.21		Midshelf	San Cristobal	1	10
161	0.1	1.05		Midshelf	San Cristobal	2	1
162	0	1.05		Midshelf	San Cristobal	2	2
163	0.15	1.05		Midshelf	San Cristobal	2	3
164	0	1.1		Midshelf	San Cristobal	2	4
165	1.2	1.35		Midshelf	San Cristobal	2	5
166	1	1.53		Midshelf	San Cristobal	2	6
167	2.65	1.54		Midshelf	San Cristobal	2	7
168	3.9	1.59		Midshelf	San Cristobal	2	8
169	3.5	1.22		Midshelf	San Cristobal	2	9
170	2.8	1.42		Midshelf	San Cristobal	2	10
171	0.15	1.33		Midshelf	San Cristobal	3	1
172	0.2	1.5		Midshelf	San Cristobal	3	2
173	0.3	1.22		Midshelf	San Cristobal	3	3
174	0.15	1.1		Midshelf	San Cristobal	3	4
175	0	1.27		Midshelf	San Cristobal	3	5
176	0	1.27		Midshelf	San Cristobal	3	6
177	0	1.27		Midshelf	San Cristobal	3	7
178	0	1.27		Midshelf	San Cristobal	3	8
179	0	1.27		Midshelf	San Cristobal	3	9
180	0	1.27		Midshelf	San Cristobal	3	10
