# Supplementary material for: Lack of recovery of the long-spined sea urchin Diadema antillarum Philippi in Puerto Rico 30 years after the Caribbean-wide mass mortality
Source: PeerJ. 2020 Feb 12;8:e8428. doi: 10.7717/peerj.8428 (PMC7023838; doi:10.7717/peerj.8428)
Supplement: Supplemental Information 2 [file peerj-08-8428-s002.xlsx]

## Sheet: Sheet1
Location	Depth (m)	Size (mm)
Caracoles North	0-5	3
Caracoles North	0-5	4
Caracoles North	0-5	4
Caracoles North	0-5	4.5
Caracoles North	0-5	4.5
Caracoles North	0-5	5
Caracoles North	0-5	5
Caracoles North	0-5	5
Caracoles North	0-5	5
Caracoles North	0-5	5.5
Caracoles North	0-5	5.5
Caracoles North	0-5	5.5
Caracoles North	0-5	5.5
Caracoles North	0-5	5.5
Caracoles North	0-5	5.5
Caracoles North	0-5	5.5
Caracoles North	0-5	5.5
Caracoles North	0-5	5.5
Caracoles North	0-5	5.5
Caracoles North	0-5	6
Caracoles North	0-5	6
Caracoles North	0-5	6
Caracoles North	0-5	6
Caracoles North	0-5	6
Caracoles North	0-5	6
Caracoles North	0-5	6
Caracoles North	0-5	6
Caracoles North	0-5	6
Caracoles North	0-5	6
Caracoles North	0-5	6
Caracoles North	0-5	6
Caracoles North	0-5	6
Caracoles North	0-5	6
Caracoles North	0-5	6
Caracoles North	0-5	6
Caracoles North	0-5	6
Caracoles North	0-5	6
Caracoles North	0-5	6
Caracoles North	0-5	6
Caracoles North	0-5	6
Caracoles North	0-5	6
Caracoles North	0-5	6
Caracoles North	0-5	6
Caracoles North	0-5	6
Caracoles North	0-5	6.5
Caracoles North	0-5	6.5
Caracoles North	0-5	6.5
Caracoles North	0-5	6.5
Caracoles North	0-5	6.5
Caracoles North	0-5	6.5
Caracoles North	0-5	6.5
Caracoles North	0-5	6.5
Caracoles North	0-5	6.5
Caracoles North	0-5	6.5
Caracoles North	0-5	6.5
Caracoles North	0-5	6.5
Caracoles North	0-5	6.5
Caracoles North	0-5	6.5
Caracoles North	0-5	6.5
Caracoles North	0-5	6.5
Caracoles North	0-5	6.5
Caracoles North	0-5	6.5
Caracoles North	0-5	6.5
Caracoles North	0-5	6.5
Caracoles North	0-5	6.5
Caracoles North	0-5	6.5
Caracoles North	0-5	6.5
Caracoles North	0-5	6.5
Caracoles North	0-5	6.5
Caracoles North	0-5	7
Caracoles North	0-5	7
Caracoles North	0-5	7
Caracoles North	0-5	7
Caracoles North	0-5	7
Caracoles North	0-5	7
Caracoles North	0-5	7
Caracoles North	0-5	7
Caracoles North	0-5	7
Caracoles North	0-5	7
Caracoles North	0-5	7
Caracoles North	0-5	7
Caracoles North	0-5	7
Caracoles North	0-5	7
Caracoles North	0-5	7
Caracoles North	0-5	7
Caracoles North	0-5	7
Caracoles North	0-5	7
Caracoles North	0-5	7
Caracoles North	0-5	7
Caracoles North	0-5	7
Caracoles North	0-5	7
Caracoles North	0-5	7
Caracoles North	0-5	7
Caracoles North	0-5	7
Caracoles North	0-5	7
Caracoles North	0-5	7.5
Caracoles North	0-5	7.5
Caracoles North	0-5	7.5
Caracoles North	0-5	7.5
Caracoles North	0-5	7.5
Caracoles North	0-5	7.5
Caracoles North	0-5	7.5
Caracoles North	0-5	7.5
Caracoles North	0-5	7.5
Caracoles North	0-5	7.5
Caracoles North	0-5	7.5
Caracoles North	0-5	7.5
Caracoles North	0-5	7.5
Caracoles North	0-5	7.5
Caracoles North	0-5	8
Caracoles North	0-5	8
Caracoles North	0-5	8
Caracoles North	0-5	8
Caracoles North	0-5	8
Caracoles North	0-5	8
Caracoles North	0-5	8
Caracoles North	0-5	8
Caracoles North	0-5	8
Caracoles North	0-5	8
Caracoles North	0-5	8
Caracoles North	0-5	8
Caracoles North	0-5	8.5
Caracoles North	0-5	8.5
Caracoles North	0-5	8.5
Caracoles North	0-5	8.5
Caracoles North	0-5	9
Caracoles North	7 to 12	2
Caracoles North	7 to 12	6
Caracoles North	7 to 12	6.5
Caracoles North	7 to 12	6.5
Caracoles North	7 to 12	6.5
Caracoles North	7 to 12	6.5
Caracoles North	7 to 12	6.5
Caracoles North	7 to 12	7
Caracoles North	7 to 12	7
Caracoles North	7 to 12	7
Caracoles North	7 to 12	7.5
Caracoles North	7 to 12	7.5
Caracoles North	7 to 12	7.5
Caracoles North	7 to 12	8
Caracoles North	7 to 12	8
Caracoles North	7 to 12	8
Caracoles North	7 to 12	8.5
Caracoles North	7 to 12	8.5
Caracoles North	7 to 12	8.5
Caracoles North	12+	6
Caracoles North	12+	7.2
Caracoles North	12+	7
Caracoles North	12+	7.5
Enrique	0-5	1.5
Enrique	0-5	1.5
Enrique	0-5	1.5
Enrique	0-5	2
Enrique	0-5	2.5
Enrique	0-5	4
Enrique	0-5	5
Enrique	0-5	5.5
Enrique	0-5	5.5
Enrique	0-5	6
Enrique	0-5	6
Enrique	0-5	6
Enrique	0-5	6
Enrique	0-5	6
Enrique	0-5	6
Enrique	0-5	6
Enrique	0-5	6
Enrique	0-5	6
Enrique	0-5	6
Enrique	0-5	6.5
Enrique	0-5	6.5
Enrique	0-5	6.5
Enrique	0-5	6.5
Enrique	0-5	6.5
Enrique	0-5	7
Enrique	0-5	7
Enrique	0-5	7
Enrique	0-5	7
Enrique	0-5	7
Enrique	0-5	7
Enrique	0-5	7
Enrique	0-5	7
Enrique	0-5	7
Enrique	0-5	7
Enrique	0-5	7
Enrique	0-5	7
Enrique	0-5	7
Enrique	0-5	7
Enrique	0-5	7.5
Enrique	0-5	7.5
Enrique	0-5	7.5
Enrique	0-5	7.5
Enrique	0-5	7.5
Enrique	0-5	7.5
Enrique	0-5	7.5
Enrique	0-5	7.5
Enrique	0-5	8
Enrique	0-5	8
Enrique	0-5	8
Enrique	0-5	8
Enrique	0-5	8.5
Enrique	0-5	8.5
Enrique	7 to 12	9.5
Laurel	0-5	1.5
Laurel	0-5	2
Laurel	0-5	2.5
Laurel	0-5	3
Laurel	0-5	3
Laurel	0-5	3
Laurel	0-5	3
Laurel	0-5	3
Laurel	0-5	3.5
Laurel	0-5	4
Laurel	0-5	4
Laurel	0-5	4
Laurel	0-5	4
Laurel	0-5	4
Laurel	0-5	4.5
Laurel	0-5	4.5
Laurel	0-5	4.5
Laurel	0-5	5
Laurel	0-5	5
Laurel	0-5	5
Laurel	0-5	5
Laurel	0-5	5
Laurel	0-5	5
Laurel	0-5	5
Laurel	0-5	5
Laurel	0-5	5.5
Laurel	0-5	5.5
Laurel	0-5	5.5
Laurel	0-5	5.5
Laurel	0-5	5.5
Laurel	0-5	5.5
Laurel	0-5	5.5
Laurel	0-5	6
Laurel	0-5	6
Laurel	0-5	6
Laurel	0-5	6
Laurel	0-5	6
Laurel	0-5	6
Laurel	0-5	6
Laurel	0-5	6
Laurel	0-5	6
Laurel	0-5	6
Laurel	0-5	6
Laurel	0-5	6
Laurel	0-5	6
Laurel	0-5	6
Laurel	0-5	6
Laurel	0-5	6
Laurel	0-5	6
Laurel	0-5	6
Laurel	0-5	6
Laurel	0-5	6.5
Laurel	0-5	6.5
Laurel	0-5	6.5
Laurel	0-5	6.5
Laurel	0-5	6.5
Laurel	0-5	6.5
Laurel	0-5	6.5
Laurel	0-5	6.5
Laurel	0-5	6.5
Laurel	0-5	6.5
Laurel	0-5	6.5
Laurel	0-5	7
Laurel	0-5	7
Laurel	0-5	7
Laurel	0-5	7
Laurel	0-5	7
Laurel	0-5	7
Laurel	0-5	7
Laurel	0-5	7
Laurel	0-5	7
Laurel	0-5	7
Laurel	0-5	7
Laurel	0-5	7
Laurel	0-5	7
Laurel	0-5	7
Laurel	0-5	7
Laurel	0-5	7
Laurel	0-5	7
Laurel	0-5	7
Laurel	0-5	7
Laurel	0-5	7
Laurel	0-5	7.5
Laurel	0-5	7.5
Laurel	0-5	7.5
Laurel	0-5	7.5
Laurel	0-5	7.5
Laurel	0-5	7.5
Laurel	0-5	7.5
Laurel	0-5	8
Laurel	0-5	8
Laurel	0-5	8
Laurel	0-5	8
Laurel	0-5	8
Laurel	0-5	8
Laurel	0-5	8
Laurel	0-5	8
Laurel	0-5	8
Laurel	0-5	8
Laurel	0-5	8
Laurel	0-5	8
Laurel	0-5	8
Laurel	0-5	8
Laurel	0-5	8.5
Laurel	0-5	8.5
Laurel	0-5	9
Laurel	0-5	9
Laurel	0-5	9
Laurel	0-5	9
Laurel	0-5	9.5
Laurel	12+	5.5
Laurel	12+	6
Laurel	12+	6.5
Laurel	12+	7
Laurel	12+	7
Laurel	12+	7
Laurel	12+	7.5
Laurel	12+	7.5
Laurel	12+	7.5
Laurel	12+	7.5
Laurel	12+	7.5
Laurel	12+	8
Laurel	12+	8
Laurel	12+	8
Laurel	12+	8
Laurel	12+	8
Laurel	12+	8.5
Laurel	12+	8.5
Laurel	7 to 12	4
Laurel	7 to 12	4
Laurel	7 to 12	4.5
Laurel	7 to 12	4.5
Laurel	7 to 12	5
Laurel	7 to 12	5
Laurel	7 to 12	5
Laurel	7 to 12	5
Laurel	7 to 12	5.5
Laurel	7 to 12	5.5
Laurel	7 to 12	5.5
Laurel	7 to 12	6
Laurel	7 to 12	6
Laurel	7 to 12	6
Laurel	7 to 12	6
Laurel	7 to 12	6.5
Laurel	7 to 12	6.5
Laurel	7 to 12	6.5
Laurel	7 to 12	6.5
Laurel	7 to 12	7
Laurel	7 to 12	8
Laurel	7 to 12	8
Laurel	7 to 12	8.5
San Cristobal	12+	8
San Cristobal	12+	8.5
San Cristobal	12+	7.5
San Cristobal	12+	7
San Cristobal	12+	8
San Cristobal	12+	2.5
San Cristobal	12+	3
San Cristobal	12+	6
San Cristobal	12+	5
San Cristobal	12+	4
San Cristobal	12+	5.5
San Cristobal	12+	6
San Cristobal	12+	5
San Cristobal	12+	7
San Cristobal	12+	2.5
San Cristobal	7 to 12	3
San Cristobal	7 to 12	4
San Cristobal	7 to 12	4
San Cristobal	7 to 12	4
San Cristobal	7 to 12	4
San Cristobal	7 to 12	4
San Cristobal	7 to 12	4
San Cristobal	7 to 12	4
San Cristobal	7 to 12	4
San Cristobal	7 to 12	4
San Cristobal	7 to 12	4
San Cristobal	7 to 12	4.5
San Cristobal	7 to 12	4.5
San Cristobal	7 to 12	4.5
San Cristobal	7 to 12	4.5
San Cristobal	7 to 12	4.5
San Cristobal	7 to 12	4.5
San Cristobal	7 to 12	4.5
San Cristobal	7 to 12	4.5
San Cristobal	7 to 12	4.5
San Cristobal	7 to 12	4.5
San Cristobal	7 to 12	5
San Cristobal	7 to 12	5
San Cristobal	7 to 12	5
San Cristobal	7 to 12	5
San Cristobal	7 to 12	5
San Cristobal	7 to 12	5
San Cristobal	7 to 12	5
San Cristobal	7 to 12	5
San Cristobal	7 to 12	5
San Cristobal	7 to 12	5
San Cristobal	7 to 12	5
San Cristobal	7 to 12	5
San Cristobal	7 to 12	5
San Cristobal	7 to 12	5
San Cristobal	7 to 12	5
San Cristobal	7 to 12	5.5
San Cristobal	7 to 12	5.5
San Cristobal	7 to 12	5.5
San Cristobal	7 to 12	5.5
San Cristobal	7 to 12	5.5
San Cristobal	7 to 12	5.5
San Cristobal	7 to 12	5.5
San Cristobal	7 to 12	5.5
San Cristobal	7 to 12	5.5
San Cristobal	7 to 12	5.5
San Cristobal	7 to 12	5.5
San Cristobal	7 to 12	5.5
San Cristobal	7 to 12	6
San Cristobal	7 to 12	6
San Cristobal	7 to 12	6
San Cristobal	7 to 12	6
San Cristobal	7 to 12	6
San Cristobal	7 to 12	6
San Cristobal	7 to 12	6
San Cristobal	7 to 12	6
San Cristobal	7 to 12	6
San Cristobal	7 to 12	6
San Cristobal	7 to 12	6
San Cristobal	7 to 12	6
San Cristobal	7 to 12	6
San Cristobal	7 to 12	6
San Cristobal	7 to 12	6
San Cristobal	7 to 12	6
San Cristobal	7 to 12	6
San Cristobal	7 to 12	6
San Cristobal	7 to 12	6
San Cristobal	7 to 12	6
San Cristobal	7 to 12	6
San Cristobal	7 to 12	6
San Cristobal	7 to 12	6
San Cristobal	7 to 12	6
San Cristobal	7 to 12	6
San Cristobal	7 to 12	6.5
San Cristobal	7 to 12	6.5
San Cristobal	7 to 12	6.5
San Cristobal	7 to 12	6.5
San Cristobal	7 to 12	6.5
San Cristobal	7 to 12	6.5
San Cristobal	7 to 12	6.5
San Cristobal	7 to 12	7
San Cristobal	7 to 12	7
San Cristobal	7 to 12	7
San Cristobal	7 to 12	7
San Cristobal	7 to 12	7
San Cristobal	7 to 12	7
San Cristobal	7 to 12	7
San Cristobal	7 to 12	7
San Cristobal	7 to 12	7
San Cristobal	7 to 12	7
San Cristobal	7 to 12	7
San Cristobal	7 to 12	7
San Cristobal	7 to 12	7
San Cristobal	7 to 12	7
San Cristobal	7 to 12	7
San Cristobal	7 to 12	7.5
San Cristobal	7 to 12	7.5
San Cristobal	7 to 12	8
San Cristobal	7 to 12	8
San Cristobal	7 to 12	9
San Cristobal	0-5	2
San Cristobal	0-5	2.5
San Cristobal	0-5	2.5
San Cristobal	0-5	3
San Cristobal	0-5	3
San Cristobal	0-5	3
San Cristobal	0-5	3
San Cristobal	0-5	3
San Cristobal	0-5	3
San Cristobal	0-5	3.5
San Cristobal	0-5	3.5
San Cristobal	0-5	3.5
San Cristobal	0-5	3.5
San Cristobal	0-5	4
San Cristobal	0-5	4
San Cristobal	0-5	4.5
San Cristobal	0-5	4.5
San Cristobal	0-5	4.5
San Cristobal	0-5	4.5
San Cristobal	0-5	4.5
San Cristobal	0-5	5
San Cristobal	0-5	5
San Cristobal	0-5	5
San Cristobal	0-5	5
San Cristobal	0-5	5
San Cristobal	0-5	5
San Cristobal	0-5	5
San Cristobal	0-5	5
San Cristobal	0-5	5
San Cristobal	0-5	5
San Cristobal	0-5	5
San Cristobal	0-5	5
San Cristobal	0-5	5
San Cristobal	0-5	5
San Cristobal	0-5	5.5
San Cristobal	0-5	5.5
San Cristobal	0-5	5.5
San Cristobal	0-5	5.5
San Cristobal	0-5	5.5
San Cristobal	0-5	6
San Cristobal	0-5	6
San Cristobal	0-5	6
San Cristobal	0-5	6
San Cristobal	0-5	6
San Cristobal	0-5	6
San Cristobal	0-5	6
San Cristobal	0-5	6
San Cristobal	0-5	6
San Cristobal	0-5	6
San Cristobal	0-5	6
San Cristobal	0-5	6
San Cristobal	0-5	6
San Cristobal	0-5	6
San Cristobal	0-5	6
San Cristobal	0-5	6
San Cristobal	0-5	6
San Cristobal	0-5	6.5
San Cristobal	0-5	6.5
San Cristobal	0-5	6.5
San Cristobal	0-5	6.5
San Cristobal	0-5	6.5
San Cristobal	0-5	6.5
San Cristobal	0-5	6.5
San Cristobal	0-5	6.5
San Cristobal	0-5	6.5
San Cristobal	0-5	6.5
San Cristobal	0-5	6.5
San Cristobal	0-5	6.5
San Cristobal	0-5	6.5
San Cristobal	0-5	6.5
San Cristobal	0-5	6.5
San Cristobal	0-5	6.5
San Cristobal	0-5	7
San Cristobal	0-5	7
San Cristobal	0-5	7
San Cristobal	0-5	7
San Cristobal	0-5	7
San Cristobal	0-5	7
San Cristobal	0-5	7
San Cristobal	0-5	7
San Cristobal	0-5	7
San Cristobal	0-5	7
San Cristobal	0-5	7
San Cristobal	0-5	7
San Cristobal	0-5	7
San Cristobal	0-5	7
San Cristobal	0-5	7
San Cristobal	0-5	7
San Cristobal	0-5	7
San Cristobal	0-5	7
San Cristobal	0-5	7
San Cristobal	0-5	7
San Cristobal	0-5	7
San Cristobal	0-5	7
San Cristobal	0-5	7.5
San Cristobal	0-5	7.5
San Cristobal	0-5	7.5
San Cristobal	0-5	7.5
San Cristobal	0-5	7.5
San Cristobal	0-5	7.5
San Cristobal	0-5	7.5
San Cristobal	0-5	7.5
San Cristobal	0-5	7.5
San Cristobal	0-5	7.5
San Cristobal	0-5	7.5
San Cristobal	0-5	8
San Cristobal	0-5	8
San Cristobal	0-5	8
San Cristobal	0-5	8
San Cristobal	0-5	8
San Cristobal	0-5	8
San Cristobal	0-5	8
San Cristobal	0-5	8
San Cristobal	0-5	8
San Cristobal	0-5	8
San Cristobal	0-5	8
San Cristobal	0-5	8
San Cristobal	0-5	8
San Cristobal	0-5	8
San Cristobal	0-5	8
San Cristobal	0-5	8
San Cristobal	0-5	8
San Cristobal	0-5	8.5
San Cristobal	0-5	8.5
San Cristobal	0-5	8.5
San Cristobal	0-5	9
San Cristobal	0-5	9
San Cristobal	0-5	9
San Cristobal	0-5	10
San Cristobal	0-5	10.5
M Luna	7 to 12	4
M Luna	7 to 12	4
M Luna	7 to 12	4
M Luna	7 to 12	4
M Luna	7 to 12	4.5
M Luna	7 to 12	5
M Luna	7 to 12	6
M Luna	7 to 12	6
M Luna	7 to 12	6
M Luna	7 to 12	6
M Luna	7 to 12	6.5
M Luna	7 to 12	7
M Luna	7 to 12	7
M Luna	7 to 12	7.5
M Luna	7 to 12	8
M Luna	7 to 12	9
M Luna	7 to 12	9
M Luna	7 to 12	9
M Luna	7 to 12	9
M Luna	7 to 12	9.5
M Luna	7 to 12	10
M.Luna	0-5	2
M.Luna	0-5	3.5
M.Luna	0-5	3.5
M.Luna	0-5	4
M.Luna	0-5	4
M.Luna	0-5	4
M.Luna	0-5	4.5
M.Luna	0-5	4.5
M.Luna	0-5	5
M.Luna	0-5	5
M.Luna	0-5	5
M.Luna	0-5	5
M.Luna	0-5	5
M.Luna	0-5	5
M.Luna	0-5	5.5
M.Luna	0-5	5.5
M.Luna	0-5	5.5
M.Luna	0-5	5.5
M.Luna	0-5	5.5
M.Luna	0-5	5.5
M.Luna	0-5	5.5
M.Luna	0-5	6
M.Luna	0-5	6
M.Luna	0-5	6
M.Luna	0-5	6
M.Luna	0-5	6
M.Luna	0-5	6
M.Luna	0-5	6
M.Luna	0-5	6
M.Luna	0-5	6
M.Luna	0-5	6
M.Luna	0-5	6
M.Luna	0-5	6
M.Luna	0-5	6
M.Luna	0-5	6
M.Luna	0-5	6
M.Luna	0-5	6
M.Luna	0-5	6.5
M.Luna	0-5	6.5
M.Luna	0-5	6.5
M.Luna	0-5	6.5
M.Luna	0-5	6.5
M.Luna	0-5	6.5
M.Luna	0-5	6.5
M.Luna	0-5	6.5
M.Luna	0-5	6.5
M.Luna	0-5	6.5
M.Luna	0-5	6.5
M.Luna	0-5	6.5
M.Luna	0-5	6.5
M.Luna	0-5	6.5
M.Luna	0-5	6.5
M.Luna	0-5	6.5
M.Luna	0-5	6.5
M.Luna	0-5	6.5
M.Luna	0-5	6.5
M.Luna	0-5	7
M.Luna	0-5	7
M.Luna	0-5	7
M.Luna	0-5	7
M.Luna	0-5	7
M.Luna	0-5	7
M.Luna	0-5	7
M.Luna	0-5	7
M.Luna	0-5	7
M.Luna	0-5	7
M.Luna	0-5	7
M.Luna	0-5	7
M.Luna	0-5	7
M.Luna	0-5	7
M.Luna	0-5	7
M.Luna	0-5	7
M.Luna	0-5	7.5
M.Luna	0-5	7.5
M.Luna	0-5	7.5
M.Luna	0-5	7.5
M.Luna	0-5	7.5
M.Luna	0-5	7.5
M.Luna	0-5	7.5
M.Luna	0-5	7.5
M.Luna	0-5	7.5
M.Luna	0-5	7.5
M.Luna	0-5	7.5
M.Luna	0-5	7.5
M.Luna	0-5	8
M.Luna	0-5	8
M.Luna	0-5	8
M.Luna	0-5	8
M.Luna	0-5	8
M.Luna	0-5	8
M.Luna	0-5	8
M.Luna	0-5	8
M.Luna	0-5	8
M.Luna	0-5	8
M.Luna	0-5	8
M.Luna	0-5	8
M.Luna	0-5	8
M.Luna	0-5	8
M.Luna	0-5	8
M.Luna	0-5	8
M.Luna	0-5	8
M.Luna	0-5	8.5
M.Luna	0-5	8.5
M.Luna	0-5	8.5
M.Luna	0-5	8.5
M.Luna	0-5	8.5
M.Luna	0-5	8.5
M.Luna	0-5	8.5
M.Luna	0-5	8.5
M.Luna	0-5	8.5
M.Luna	0-5	8.5
M.Luna	0-5	8.5
M.Luna	0-5	8.5
M.Luna	0-5	8.5
M.Luna	0-5	8.5
M.Luna	0-5	8.5
M.Luna	0-5	8.5
M.Luna	0-5	8.5
M.Luna	0-5	9
M.Luna	0-5	9
M.Luna	0-5	9
M.Luna	0-5	9
M.Luna	0-5	9
M.Luna	0-5	9
M.Luna	0-5	9
M.Luna	0-5	9
M.Luna	0-5	9
M.Luna	0-5	9
M.Luna	0-5	9
M.Luna	0-5	9.5
Mata la Gata	7 to 12	2
Mata la Gata	7 to 12	2.5
Mata la Gata	7 to 12	4.5
Mata la Gata	7 to 12	4.5
Mata la Gata	7 to 12	5
Mata la Gata	7 to 12	5
Mata la Gata	7 to 12	5
Mata la Gata	7 to 12	5
Mata la Gata	7 to 12	5.5
Mata la Gata	7 to 12	5.5
Mata la Gata	7 to 12	5.5
Mata la Gata	7 to 12	5.5
Mata la Gata	7 to 12	5.5
Mata la Gata	7 to 12	5.5
Mata la Gata	7 to 12	5.5
Mata la Gata	7 to 12	5.5
Mata la Gata	7 to 12	5.5
Mata la Gata	7 to 12	5.5
Mata la Gata	7 to 12	5.5
Mata la Gata	7 to 12	5.5
Mata la Gata	7 to 12	6
Mata la Gata	7 to 12	6
Mata la Gata	7 to 12	6
Mata la Gata	7 to 12	6
Mata la Gata	7 to 12	6
Mata la Gata	7 to 12	6
Mata la Gata	7 to 12	6
Mata la Gata	7 to 12	6
Mata la Gata	7 to 12	6
Mata la Gata	7 to 12	6
Mata la Gata	7 to 12	6
Mata la Gata	7 to 12	6
Mata la Gata	7 to 12	6
Mata la Gata	7 to 12	6
Mata la Gata	7 to 12	6
Mata la Gata	7 to 12	6
Mata la Gata	7 to 12	6.5
Mata la Gata	7 to 12	6.5
Mata la Gata	7 to 12	6.5
Mata la Gata	7 to 12	6.5
Mata la Gata	7 to 12	6.5
Mata la Gata	7 to 12	6.5
Mata la Gata	7 to 12	6.5
Mata la Gata	7 to 12	6.5
Mata la Gata	7 to 12	7
Mata la Gata	7 to 12	7
Mata la Gata	7 to 12	7
Mata la Gata	7 to 12	7
Mata la Gata	7 to 12	7
Mata la Gata	7 to 12	7
Mata la Gata	7 to 12	7
Mata la Gata	7 to 12	7
Mata la Gata	7 to 12	7
Mata la Gata	7 to 12	7
Mata la Gata	7 to 12	7
Mata la Gata	7 to 12	7
Mata la Gata	7 to 12	7
Mata la Gata	7 to 12	7.5
Mata la Gata	7 to 12	7.5
Mata la Gata	7 to 12	7.5
Mata la Gata	0-5	5
Mata la Gata	0-5	5
Mata la Gata	0-5	5.5
Mata la Gata	0-5	5.5
Mata la Gata	0-5	6
Mata la Gata	0-5	6
Mata la Gata	0-5	6
Mata la Gata	0-5	6.5
Mata la Gata	0-5	6.5
Mata la Gata	0-5	6.5
Mata la Gata	0-5	6.5
Mata la Gata	0-5	6.5
Mata la Gata	0-5	6.5
Mata la Gata	0-5	7
Mata la Gata	0-5	7
Mata la Gata	0-5	7
Mata la Gata	0-5	7
Mata la Gata	0-5	7
Mata la Gata	0-5	7.5
Mata la Gata	0-5	7.5
Mata la Gata	0-5	7.5
Mata la Gata	0-5	7.5
Mata la Gata	0-5	7.5
Mata la Gata	0-5	8
Mata la Gata	0-5	8
Mata la Gata	0-5	8
Mata la Gata	0-5	8
Mata la Gata	0-5	8
Mata la Gata	0-5	8
Mata la Gata	0-5	8
Mata la Gata	0-5	8
Mata la Gata	0-5	8
Mata la Gata	0-5	8
Mata la Gata	0-5	8.5
Mata la Gata	0-5	8.5
Mata la Gata	0-5	9
Mata la Gata	0-5	9
Mata la Gata	0-5	9
Mata la Gata	0-5	9
Mata la Gata	0-5	9.5
Mata la Gata	0-5	10
Mata la Gata	0-5	10
Mata la Gata	0-5	10
Corona 1		6
Corona 1		1
Corona 1		5
Corona 1		7.5
Corona 1		4.5
Corona 1		6
Corona 1		6
Corona 1		7
Corona 1		6
Corona 1		6
Corona 1		6
Corona 1		5
Corona 1		6
Corona 1		5
Corona 1		6
Corona 1		5.5
Corona 1		6
Corona 1		7.5
Corona 1		6
Corona 1		5
Corona 1		5
Corona 1		3
Corona 1		4
Corona 1		6
Corona 1		7
Corona 1		7
Corona 1		5
Corona 1		5
Corona 1		5
Corona 1		6.5
Corona 1		5
Corona 1		6
Corona 1		6
Corona 1		6
Corona 1		6
Corona 1		5
Corona 1		1
Corona 1		6.5
Corona 1		6
Corona 1		6.5
Corona 1		6
Corona 1		6.5
Corona 1		5.5
Corona 1		5
Corona 1		6.5
Corona 1		8
Corona 1		5.5
Corona 1		6.5
Corona 1		5.5
Corona 1		5.5
Corona 1		5
Corona 1		7
Corona 1		5
Corona 1		5
Corona 1		6
Corona 1		6
Corona 1		7
Corona 1		2.5
Corona 1		7
Corona 1		4.5
Corona 1		5.5
Corona 1		8
Corona 1		4.5
Corona 1		5
Corona 1		6
Corona 1		5.5
Corona 1		7.5
Corona 1		6
Corona 1		5.5
Corona 1		6
Corona 1		6
Corona 1		5.5
Corona 1		6
Corona 1		6.5
Corona 1		6
Corona 1		7
Corona 1		5.5
Corona 1		5.5
Corona 1		5.5
Corona 1		5
Corona 2		2
Corona 2		6.5
Corona 2		8
Corona 2		6
Corona 2		7
Corona 2		5.5
Corona 3		7
Corona 3		7
Corona 3		7
Corona 3		7
Corona 3		6
Corona 3		6
Corona 3		7
Corona 3		5
Corona 3		7
Corona 3		5
Corona 3		5
Corona 3		6
Corona 3		6
Corona 3		5
Corona 3		7
Corona 3		7
Corona 3		5
Corona 3		6
Corona 3		6
Corona 3		6
Corona 3		6
Corona 3		6
Corona 3		7
Corona 3		6
Corona 3		7
Corona 3		7
Corona 3		4
Corona 3		6
Corona 3		6
Corona 3		6
Corona 3		5
Corona 3		5
Corona 3		4
Corona 3		6
Corona 3		7
Corona 3		7
Corona 3		6
Corona 3		7
Corona 3		5
Corona 3		5
Corona 3		4
Corona 3		6
Corona 3		7
Corona 3		7
Corona 3		6
Corona 3		7
Corona 3		8
Corona 3		6
Corona 3		6
Corona 3		7.5
Corona 3		6
Corona 3		6
Corona 3		7
Corona 3		7
Corona 3		7
Corona 3		5
Corona 3		7
Corona 3		7
Corona 3		6.5
Corona 3		7
Corona 3		7
Corona 3		7
Corona 3		8
Corona 3		7
Corona 3		6
Corona 3		8
Corona 3		7
Corona 3		6.5
Corona 3		7
Corona 3		7
Corona 3		7
Corona 3		7
Corona 3		6.5
Corona 3		7
Corona 3		5
Corona 3		6.5
Corona 3		7
Corona 3		7.5
Corona 3		6
Corona 3		7
Corona 3		7
Corona 3		7.5
Corona 3		6.5
Corona 3		6.5
Corona 3		6.5
Corona 3		6.5
Corona 3		7
Corona 3		6
Corona 3		7.5
Corona 3		7
Corona 3		6
Corona 3		7
Corona 3		7.5
Corona 3		5.5
Corona 3		6
Corona 3		6
Corona 3		5.5
Corona 3		8
